# Supplementary material
Source: PubMed Central journal article supplement (PMC4031536)
Supplement: supp_M113.539494_Table_S1_and_S2_article_8574.pdf [file supp_M113.539494_Table_S1_and_S2_article_8574.pdf]

## Assembly of Lipopolysaccharide in *Escherichia coli* Requires the Essential LapB Heat Shock Protein\*

Gracjana Klein<sup>1,2</sup>, Natalia Kobylak<sup>1</sup>, Buko Lindner<sup>2</sup>, Anna Stupak<sup>1</sup> and Satish Raina<sup>1,2</sup>

From the <sup>1</sup>Faculty of Chemistry, Gdansk University of Technology, Narutowicza 11/12, 80-233 Gdansk, Poland and

<sup>2</sup>Research Center Borstel, Leibniz-Center for Medicine and Biosciences, Parkallee 22, 23845 Borstel, Germany

\*Running title: *LapA- and LapB-dependent assembly of LPS in Escherichia coli*

To whom correspondence should be addressed: Satish Raina: [satish.raina@pg.gda.pl](mailto:satish.raina@pg.gda.pl) Tel.: 48-58-347-2618; Fax: 48-58-347-1822 Faculty of Chemistry, Gdansk University of Technology, Narutowicza 11/12, 80-233 Gdansk, Poland

**Keywords:** Lipopolysaccharide (LPS); heptosyltransferase; glycosyltransferase; LpxC; lipid A; myristoyltransferase; tetratricopeptide repeat (TPR); RpoH; non-coding RNA

### Supplemental information

**Table S1.** Bacterial strains and plasmids used in this study.

| Strains/Plasmids | Relevant characteristic                                                                                               | Reference or source                       |
|------------------|-----------------------------------------------------------------------------------------------------------------------|-------------------------------------------|
| Strains          |                                                                                                                       |                                           |
| W3110            | $\lambda^-$ , <i>IN(rrnD-rrnE)1</i> , <i>rph-1</i>                                                                    | <i>E. coli</i> Genetic Stock Center, Yale |
| BW25113          | <i>lacI<sup>f</sup> rrnB<sub>T14</sub> ΔlacZ<sub>WJ16</sub> hsdR514 ΔaraBAD<sub>AH33</sub> ΔrhaBAD<sub>LD78</sub></i> | (19)                                      |
| BW30207          | MG1655 <i>rph<sup>+</sup></i>                                                                                         | <i>E. coli</i> Genetic Stock Center, Yale |
| BL21(DE3)        | <i>F<sup>-</sup> ompT hsdSB(rB<sup>-</sup> mB<sup>-</sup>) gal dcm (DE3)</i>                                          | Invitrogen                                |
| GK1942           | BW25113 (pKD46)                                                                                                       | This study                                |
| SR8035           | W3110 <i>waaC&lt;&gt;aph</i>                                                                                          | (6)                                       |
| SR8233           | W3110 <i>waaC&lt;&gt;cat</i>                                                                                          | (6)                                       |
| SR9521           | BW25113 <i>lapA&lt;&gt;aph</i>                                                                                        | This study                                |
| SR9523           | BW25113 <i>lapB&lt;&gt;aph</i>                                                                                        | This study                                |
| SR16087          | BW25113 <i>lapA-lapB&lt;&gt;cat</i>                                                                                   | This study                                |
| SR17187          | BW25113 <i>lapA-lapB&lt;&gt;aph</i>                                                                                   | This study                                |
| SR17420          | BW25113 <i>lapA-lapB&lt;&gt;aph waaC&lt;&gt;cat</i>                                                                   | This study                                |
| SR8392           | W3110 <i>lapB&lt;&gt;aph waaC T187K</i>                                                                               | This study                                |
| SR8431           | BW30207 <i>lapB&lt;&gt;aph gmhA::IS1</i>                                                                              | This study                                |
| SR8915           | <i>rpoH::Kan</i>                                                                                                      | (69)                                      |
| BAS849           | <i>lptD4213</i>                                                                                                       | (54)                                      |
| PK101            | <i>(dnaK14 dnaJ14)::Kan</i>                                                                                           | (22)                                      |
| GK3078           | BW25113 <i>dnaK dnaJ::Kan</i>                                                                                         | This study                                |
| SR17161          | GK3078 <i>lapA-lapB&lt;&gt;cat</i>                                                                                    | This study                                |
| SR17401          | BW25113 $\phi$ ( <i>rpoHP3-lacZ</i> )                                                                                 | This study                                |
| SR17405          | SR17401 <i>lapA-lapB&lt;&gt;aph</i>                                                                                   | This study                                |
| SR17432          | BW25113 $\phi$ ( <i>rpoEP2-lacZ</i> )                                                                                 | This study                                |
| GK3481           | SR17432 <i>lapA-lapB&lt;&gt;aph</i>                                                                                   | This study                                |
| SR7718           | BW25113 $\phi$ ( <i>pcpxP-lacZ</i> )                                                                                  | (6)                                       |
| SR16317          | SR7718 <i>lapA-lapB&lt;&gt;cat</i>                                                                                    | This study                                |
| SR17662          | BW25113 $\phi$ ( <i>lapABP2<sub>hs</sub>-lacZ</i> )                                                                   | This study                                |
| SR6618           | BW25113 $\phi$ ( <i>pgroESL-lacZ</i> )                                                                                | This study                                |
| SR16389          | BW25113 <i>lapA::3xFLAG&lt;&gt;frt</i>                                                                                | This study                                |
| SR16430          | BW25113 <i>lapA::3xFLAG&lt;&gt;frt-phs-lapB</i>                                                                       | This study                                |
| SR16962          | BW25113 <i>lapB::3xFLAG&lt;&gt;frt</i>                                                                                | This study                                |

|          |                                                                                            |                                           |
|----------|--------------------------------------------------------------------------------------------|-------------------------------------------|
| GK2642   | BW25113 <i>lapB</i> ::1xFLAG<> <i>frt</i>                                                  | This study                                |
| SR9609   | BW25113 <i>lptD</i> ::3xFLAG<> <i>frt</i>                                                  | This study                                |
| SR17634  | SR9609 <i>lapA-lapB</i> <> <i>cat</i>                                                      | This study                                |
| SR16215  | BW25113 <i>waaC</i> ::3xFLAG<> <i>frt</i>                                                  | This study                                |
| SR16233  | SR16215 <i>lapA-lapB</i> <> <i>aph</i>                                                     | This study                                |
| SR9237   | BW25113 <i>waaO</i> ::3xFLAG<> <i>frt</i>                                                  | This study                                |
| SR17310  | SR9237 <i>lapA-lapB</i> <> <i>aph</i>                                                      | This study                                |
| GK2626   | BW25113 <i>lpxM</i> ::3xFLAG<> <i>aph</i>                                                  | (4)                                       |
| GK2640   | GK2626 <i>lpxM</i> ::3xFLAG <> <i>frt</i>                                                  | This study                                |
| GK3223   | GK2640 <i>lapA-lapB</i> <> <i>aph</i>                                                      | This study                                |
| SR16143  | SR16087 <i>lapA-lapB</i> <> <i>cat waaQ</i> ::Tn10                                         | This study                                |
| SR16156  | SR16087 <i>lapA-lapB</i> <> <i>cat waaG</i> <> <i>aph</i>                                  | This study                                |
| SR16146  | SR16087 <i>lapA-lapB</i> <> <i>cat lpp</i> ::Tn10                                          | This study                                |
| SR16181  | SR16087 <i>lapA-lapB</i> <> <i>cat lpxC186</i>                                             | This study                                |
| SR17710  | SR16087 <i>lapA-lapB</i> <> <i>cat lpxCA60</i>                                             | This study                                |
| GK3193   | BW25113 <i>lpp</i> <> <i>frt</i>                                                           | This study                                |
| GK3201   | GK3193 <i>lapA-lapB</i> <> <i>cat</i>                                                      | This study                                |
| A8926    | $\Delta$ <i>ftsH3</i> ::Kan <i>sfhC21 zad220</i> ::Tn10                                    | (23)                                      |
| GK3576   | BW25113 <i>sfhC21 zad220</i> ::Tn10                                                        | This study                                |
| GK3584   | GK3576 <i>lapA-lapB</i> <> <i>aph</i>                                                      | This study                                |
| GK3592   | GK3576 $\Delta$ <i>ftsH3</i> ::Kan                                                         | This study                                |
| GK3606   | GK3592 <i>lapA-lapB</i> <> <i>cat</i>                                                      | This study                                |
| SM101    | <i>lpxA2</i> (ts)                                                                          | <i>E. coli</i> Genetic Stock Center, Yale |
| SR17745  | SR17187 <i>lpxA2</i>                                                                       | This study                                |
| RL436    | <i>lpxD36</i> (ts)                                                                         | <i>E. coli</i> Genetic Stock Center, Yale |
| GK3558   | SR17187 <i>lpxD36</i>                                                                      | This study                                |
| RL25-1   | <i>lpxD201</i> (ts)                                                                        | <i>E. coli</i> Genetic Stock Center, Yale |
| SR17742  | SR17187 <i>lpxD201</i>                                                                     | This study                                |
| GK3097   | BW25113 <i>yceK</i> <> <i>frt</i>                                                          | This study                                |
| SR17241  | GK3097 <i>lapA-lapB</i> <> <i>cat</i>                                                      | This study                                |
| SR9423   | Bw25113 <i>rseA</i> <> <i>ada</i>                                                          | This study                                |
| SR17458  | SR17187 + <i>pslA</i> <sup>+</sup>                                                         | This study                                |
| SR17515  | BW25113 $\phi$ ( <i>pslA-lacZ</i> )                                                        | This study                                |
| GK3539   | SR17515 <i>rseA</i> <> <i>ada</i>                                                          | This study                                |
| GK2549   | BW25113 <i>degP</i> <> <i>ada</i>                                                          | This study                                |
| SR17675  | BW25113 <i>slrA</i> <sup>C</sup>                                                           | This study                                |
| SR17677  | SR17675 <i>degP</i> <> <i>ada</i>                                                          | This study                                |
| GK3565   | BW25113 <i>slrA</i> <> <i>frt</i>                                                          | This study                                |
| Plasmids |                                                                                            |                                           |
| pET28b   | expression vector                                                                          | Novagen                                   |
| pCP20    | ts replicon with inducible FLP recombinase                                                 | (19)                                      |
| pKD3     | <i>oriR6K</i> , <i>bla</i> (Amp <sup>R</sup> ), <i>kan</i> , <i>rgnB</i> (Ter), <i>cat</i> | (19)                                      |
| pKD13    | <i>oriR6K</i> , <i>bla</i> (Amp <sup>R</sup> ), <i>kan</i> , <i>rgnB</i> (Ter)             | (19)                                      |
| pKD46    | <i>araBp-gam-bet-exo</i> , <i>bla</i> (Amp <sup>R</sup> ), <i>repA101</i> (ts)             | (19)                                      |
| pLC1921  | pSC101-based low copy vectors spec <sup>R</sup>                                            | (21)                                      |
| pRS415   | <i>lacZYA</i> transcriptional fusion vectors                                               | (29)                                      |
| pRS551   | <i>lacZYA</i> transcriptional fusion vectors                                               | (29)                                      |
| pSUB312  | 1xFLAG                                                                                     | (30)                                      |
| pSUB11   | 3xFLAG                                                                                     | (30)                                      |
| pWSK29   | pSC101-based low copy vectors amp <sup>R</sup>                                             | (25)                                      |
| pWSK30   | pSC101-based low copy vectors amp <sup>R</sup>                                             | (25)                                      |
| pCA24N   | <i>ptac</i> -based expression vector cm <sup>R</sup>                                       | (26)                                      |

|                |                                                          |            |
|----------------|----------------------------------------------------------|------------|
| pSR16726       | <i>lapAB</i> <sup>+</sup> in pWSK29 amp <sup>R</sup>     | This study |
| pSR16730       | <i>lapAB</i> <sup>+</sup> in pWSK30 amp <sup>R</sup>     | This study |
| pSR16881       | <i>lapB</i> <sup>+</sup> from pSR16726 amp <sup>R</sup>  | This study |
| pGK3605        | <i>lapA</i> <sup>+</sup> in pET28b kan <sup>R</sup>      | This study |
| pSR7815        | <i>lapB</i> <sup>+</sup> in pET28b kan <sup>R</sup>      | This study |
| pSR15978       | <i>lptC</i> <sup>+</sup> in pET28b kan <sup>R</sup>      | This study |
| JW3596         | <i>waaC</i> <sup>+</sup> in pCA24N cm <sup>R</sup>       | (26)       |
| JW0175         | <i>fabZ</i> <sup>+</sup> in pCA24N cm <sup>R</sup>       | (26)       |
| pSR17452       | <i>slrA</i> <sup>+</sup> in pRS415 amp <sup>R</sup>      | This study |
| <i>plptBFG</i> | Spec <sup>R</sup> plasmid                                | (11)       |
| pDM38          | pWSK29 <i>dnaK</i> <sup>+</sup> <i>dnaJ</i> <sup>+</sup> | (70)       |

## References

69. Klein, G., Dartigalongue, C., and Raina, S. (2003) Phosphorylation-mediated regulation of heat shock response in *Escherichia coli*. *Mol. Microbiol.* **48**, 269-285
70. Missiakas, D., Georgopoulos, C., and Raina, S. (1993) The *Escherichia coli* heat shock gene *htpY*: mutational analysis, cloning, sequencing, and transcriptional regulation. *J. Bacteriol.* **175**, 2613-2624

**Table S2. Primers**

**For gene disruptions:**

|                     |                                                                                                         |
|---------------------|---------------------------------------------------------------------------------------------------------|
| <b>lapA_for cm</b>  | 5'-TAA GTT GAC CAT AAT TTA TTC GCT CTA ACC ACA TAA CGG GAA<br>GTA ATG TGC ATA TGA ATA TCC TCC TTA G-3'  |
| <b>lapA_for kan</b> | 5'-TAA GTT GAC CAT AAT TTA TTC GCT CTA ACC ACA TAA CGG GAA<br>GTA ATG TGA TTC CGG GGA TCC GTC GAC C-3'  |
| <b>lapB_for cm</b>  | 5'-ACG TGG CTG TAG TGC CGC ACT CGT CAG CGG CGA AGG AAT AAC<br>TTT CTA TGC ATA TGA ATA TCC TCC TTA G-3'  |
| <b>lapB_rev cm</b>  | 5'-TGT AAC TAA AGT CGG ATT TTT TTT AAA AAT TAC AGG CCA TCA<br>AGA CCG CGG TGT AGG CTG GAG CTG CTT C-3'  |
| <b>lapB_for kan</b> | 5'-ACG TGG CTG TAG TGC CGC ACT CGT CAG CGG CGA AGG AAT AAC<br>TTT CTA TGA TTC CGG GGA TCC GTC GAC C-3'  |
| <b>lapB_rev kan</b> | 5'-TGT AAC TAA AGT CGG ATT TTT TTT AAA AAT TAC AGG CCA TCA<br>AGA CCG CGT GTA GGC TGG AGC TGC TTC G-3'  |
| <b>slrA_for</b>     | 5'-ATC AAA AAT TAT GGA ACT TAT TGC CCA TCG TGA TGC TCC AAT<br>CAT TAT GGA TTC CGG GGA TCC GTC GAC C-3'  |
| <b>slrA_rev</b>     | 5'-CGG TTA TCG TTC GTT TTT TAT ACT GTT CAG GGA TAA AAA AAG<br>GCC CCT GTT GTA GGC TGG AGC TGC TTC G-3'  |
| <b>yceK_for</b>     | 5'-TTT TTT TAC GAA AGA GGT ATC AAA TGC GTT TAA TTG TGG TGA<br>GCA ATC ATG GCA CCT TGC CGT AGA AGA AC-3' |
| <b>yceK_rev</b>     | 5'-CAG CAG CTG ATG AGT GGG ATG AAC GTT AAT CAC TCA TAC GGG<br>CCA TGA ATG TAA CGC TTG AGT TAA GCC GC-3' |
| <b>lpp_for</b>      | 5'-ACT TGT AAC GCT ACA TGG AGA TTA ACT CAA TCT AGA GGG TAT<br>TAA TAA TGA TTC CGG GGA TCC GTC GAC C-3'  |
| <b>lpp_rev</b>      | 5'-GTG CGC CAT TTT TCA CTT CAC AGG TAC TAT TAC TTG CGG TAT<br>TTA GTA GCT GTA GGC TGG AGC TGC TTC G-3'  |

**For cloning, sequencing and overexpression of specific genes:**

|                 |                                                   |
|-----------------|---------------------------------------------------|
| <b>lapA_for</b> | 5'-ACG GGA AGT CAT ATG AAA TAT TTA CTC-3'         |
| <b>lapA_rev</b> | 5'-CCA GCA TAG ACT CGA GTT CCT TCG C-3'           |
| <b>lapB_for</b> | 5'-GAA TAA CTT TCC ATG GTG GAG TTG TTG-3'         |
| <b>lapB_rev</b> | 5'-TCG GAT TTT TTT TAA CTC GAG CAG GCC ATC AAG-3' |
| <b>waaC_for</b> | 5'-TGA CGC TGC GGA GGG TTA TCA CCA-3'             |
| <b>waaC_rev</b> | 5'-CAT TGA TGA TTT CAG AGT GTA AGG-3'             |
| <b>lptC_for</b> | 5'- AAA GGG CAA TCC ATA TGA GTA AAG CCA GAC G -3' |
| <b>lptC_rev</b> | 5'- TGG CAA GCA CAC TCG AGA GGC TGA GTT TG-3'     |
| <b>slrA_for</b> | 5'-CTG GCA GTG AGA ATT CAT CGC GCC TTC GA-3'      |
| <b>slrA_rev</b> | 5'-GCT CAA CGG ATC CCG GTT ATC GTT CG-3'          |
| <b>lpxC_for</b> | 5'-CCC AGC ATT CCT GCG TAA GCA AGC TGA-3'         |
| <b>lpxC_rev</b> | 5'-GAG AGA GTG CCA GAT TTG CCA GTC GA-3'          |

**For mutagenesis of *lapA-lapB* operon:**

|                    |                                                     |
|--------------------|-----------------------------------------------------|
| <b>lapAB-1_for</b> | 5'-TGG CGG TGG CAA CGT GGA TCC CGC AAC GAA TTT G-3' |
| <b>lapAB-2_rev</b> | 5'-CAT TAA TAA TTA GAA GCT TGT AAC TAA AGT CGG-3'   |

**For promoter cloning:**

|                                 |                                               |
|---------------------------------|-----------------------------------------------|
| <b>p<sub>h</sub>s lapAB_rev</b> | 5'-GTA CCA GGA TCC CGC CGT CTG CGA AA-3'      |
| <b>plapAB_for</b>               | 5'-GTA GCT ACG TTG AAT TCG TGG GCG C-3'       |
| <b>plapAB_rev</b>               | 5'-CCG TCG TTG CCC GGG CAC AAT GAA ACA TTA-3' |

**pslrA\_for** 5'-CTGGCAGTGAGAATTCATCGCGCCTTCGA-3'  
**pslrA\_rev** 5'-GCTCAACGGATCCCGGTTATCGTTTCG-3'

**For promoter mapping:**

**Lap\_PE1** 5'-CAT TAC TTC CCG TTA TGT GGT TAG AGC GA-3'  
**Lap\_PE2** 5'-CGA AGA TCG CTA ACA CCA GTA AG-3'  
**slr\_RACE1** 5'-CGA GCA AGC ATC ATA TTG-3'  
**slr\_RACE2** 5'-GGC GAC ATG ATG CAA CGG TA-3'

**For epitope tagging:**

**lapA 3xFLAG\_for** 5'-TCA CCC GCG ACT GAC GTG GCT GTA GTG CCG CAC TCG TCA  
GCG GCG AAG GAA GAC TAC AAA GAC CAT GAC GG-3'  
**lapA 3xFLAG\_rev** 5'-CCA TAG GCA GCG GCT ACA GGC AAA AGC AGA AAC AAC AAC  
TCC AGC ATA GAC ATA TGA ATA TCC TCC TTA G-3'  
**lapB 3xFLAG\_for** 5'-CTT GTC GGG CCT GGT CAA CCA TTA AAC CGA TTC GCG GTC  
TTG ATG GCC TGG ACT ACA AAG ACC ATG ACG G-3'  
**lapB 3xFLAG\_rev** 5'-AAT GGA ACA TTA ATA ATT AGT ATG TTG TAA CTA AAG TCG  
GAT TTT TTT TAC ATA TGA ATA TCC TCC TTA G-3'  
**lapB 1xFLAG\_for** 5'-CTT GTC GGG CCT GGT CAA CCA TTA AAC CGA TTC GCG GTC  
TTG ATG GCC TGG ACT ACA AAG ATG ACG ACG A-3'  
**lapB 6xHis\_for** 5'-CTT GTC GGG CCT GGT CAA CCA TTA AAC CGA TTC GCG GTC  
TTG ATG GCC TGC ACC ACC ATC ATC ACC ATT AG-3'  
**lptD 3xFLAG\_for** 5'-GTA CGC AAG AGA TGC TGC GTT CGA ACA TTC TGC CGT ATC  
AAA ACA CTT TGG ACT ACA AAG ACC ATG ACG G-3'  
**lptD 3xFLAG\_rev** 5'-CAT ACT TTT TCC ATT TCA ATT AAC CGC ACT GCG GAT TAC  
GTG GTA AAT CAC ATA TGA ATA TCC TCC TTA G-3'  
**waaC 3xFLAG\_for** 5'-ATT TAA TTA ACC TCA ACA GTC AAG CAG TTT TGG AAA AGT  
TAT CAT CAT TAG ACT ACA AAG ACC ATG ACG G-3'  
**waaC 3xFLAG\_rev** 5'-AGT GTA AGG TTT CAA TGA ATG AAG TTT AAA GGA TGT TAG  
CAT GTT TTA CCC ATA TGA ATA TCC TCC TTA G-3'  
**waaO 3xFLAG\_for** 5'-TAA AAG GAT TTA GCA ACT ATC TTT TTT ATT TTA TTG AAA  
AGA TAA AGC ATG ACT ACA AAG ACC ATG ACG G-3'  
**waaO 3xFLAG\_rev** 5'-TAA AAG GAT TTA GCA ACT ATC TTT TTT ATT TTA TTG AAA  
AGA TAA AGC ATG ACT ACA AAG ACC ATG ACG G-3'
